# Supplementary material for: Identification of d-arabinan-degrading enzymes in mycobacteria
Source: PubMed Central journal article supplement (PMC10115798; doi:10.1038/s41467-023-37839-5), 2023-04-19
Supplement: 41467_2023_37839_MOESM1_ESM.pdf [file 41467_2023_37839_MOESM1_ESM.pdf]

**Supplementary Information:  
Identification of D-arabinan-degrading enzymes in mycobacteria**

**Supplementary Figures**

Figure S1: Identification of PULs associated with D-galactan degradation

Figure S2: *D. gadei* whole cell proteomics

Figure S3: TLC of GH172 enzyme catalysed reactions.

Figure S4: Michaelis-Menten Kinetics of GH172 enzymes against pNP- $\alpha$ -D-Araf and AG.

Figure S5: SEC-MALS of GH172 enzymes

Figure S6: Sequence alignment of GH172 enzymes

Figure S7: SEC-MALS analysis of Dg<sub>GH172c</sub> mutants

Figure S8: Phylogeny of DUF4185 enzymes found in selected acid-fast bacteria

Figure S9: Organisation of phage lysis cassettes in cluster C, DQ and a *Rhodococcus* phage singleton

Figure S10: TLC of DUF4185 enzyme catalysed reactions.

Figure S11: Sequence alignment of DUF4185 proteins

Figure S12: Start site analysis for Rv3707c

Figure S13: Release of fluorescently labelled D-arabinan by selected acid-fast enzymes

Figure S14: Uncropped TLCs for figures in this paper.

**Supplementary Tables**

Table S1: Recipe for 2x defined minimal media

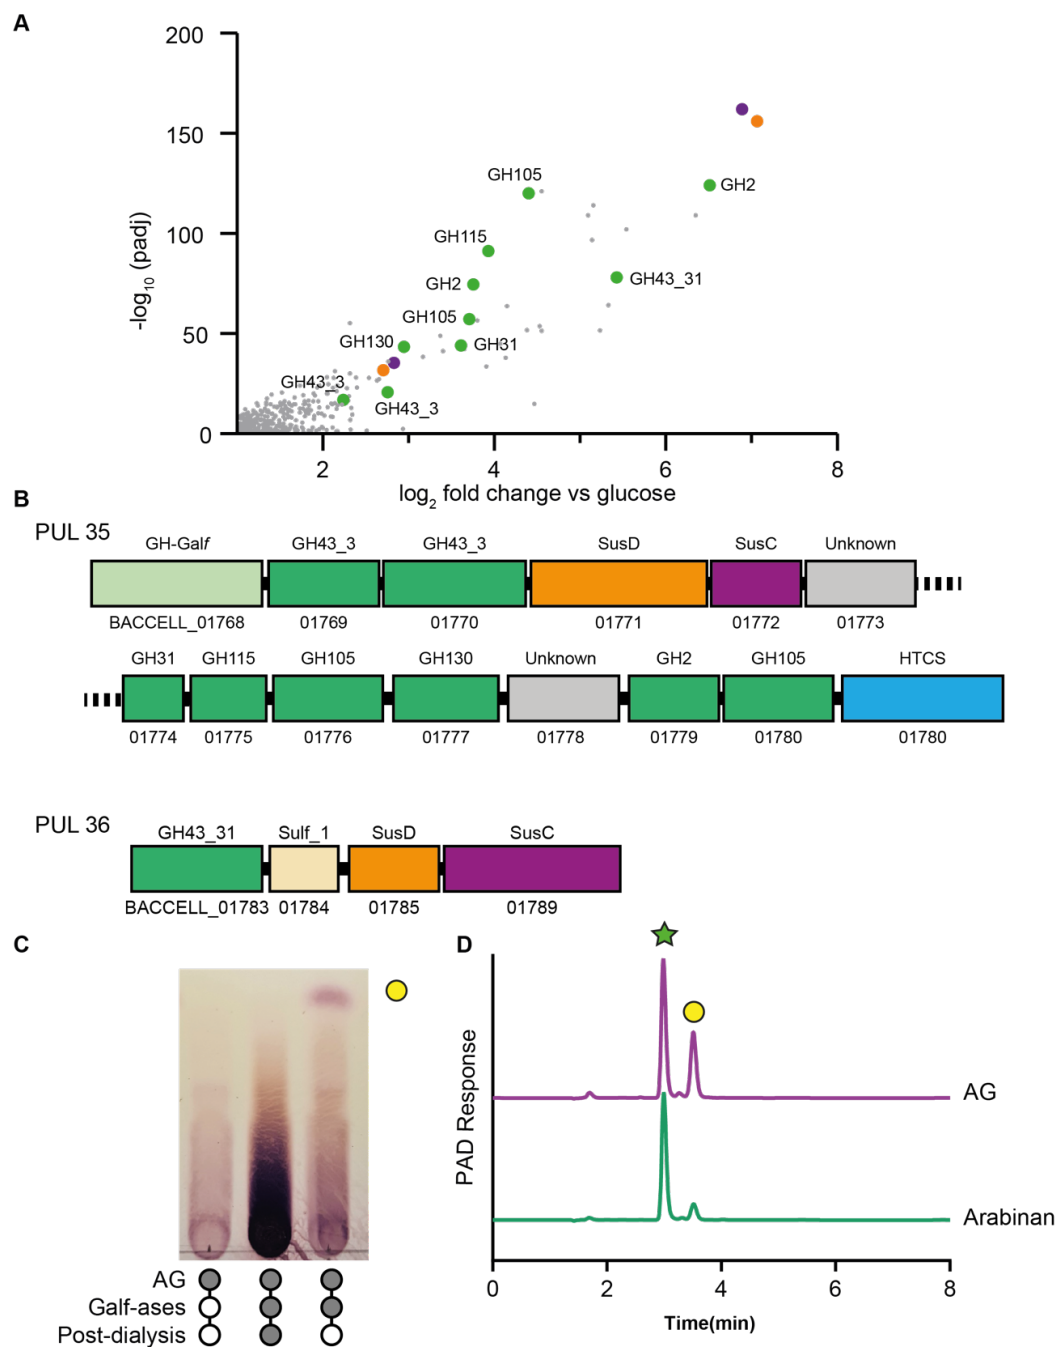

**Figure S1. Identification of PULs associated with D-galactan degradation.** **A)** Transcriptomic analysis of *B. cellulosilyticus* cells grown on arabinogalactan (AG) as compared to those grown on glucose as a sole carbon source. Transcriptomic analysis of *B. cellulosilyticus* cells grown on AG (n=3) as compared to those grown on glucose (n=3) as a sole carbon source. Differentially expressed genes were determined according to a negative binomial model with DESeq2 and adjusted for multiple testing using the Benjamini-Hochberg method. **B)** PULs identified as being upregulated during growth on AG based on the proteomic analysis. **C)** AG from *M. smegmatis* was treated with 1  $\mu\text{M}$  *B. fingoldii* enzymes BACFIN\_08810 and BACFIN\_04787 overnight, then dialysed to remove free galactose. **D)** Acid hydrolysed aliquots of treated arabinan and untreated arabinogalactan were analysed by ion-exchange chromatography with pulsed amperometric detection (IC-PAD). Comparison to arabinose and galactose standards showed an approximate 70% reduction in galactose in the treated D-arabinan. Green star – D-arabinose, yellow circle – D-galactose. Source data are provided in the Source Data file.

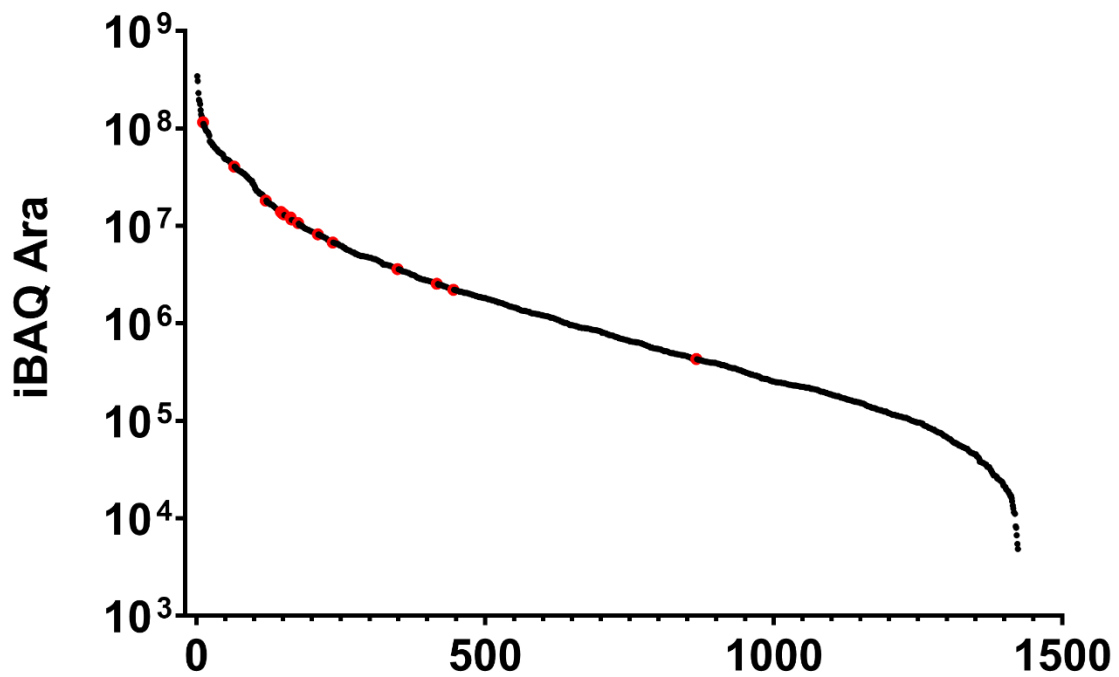

**Figure S2: *D. gadei* whole cell proteomics** Dynamic range of the *D. gadei* proteome, based on ranked iBAQ intensity, when grown on D-arabinan. Proteins from PUL42 are identified in red. The mass spectrometry data have been deposited to the ProteomeXchange Consortium via the PRIDE partner repository with the dataset identifier PXD039984 (<http://www.ebi.ac.uk/pride/archive/projects/PXD039984>).

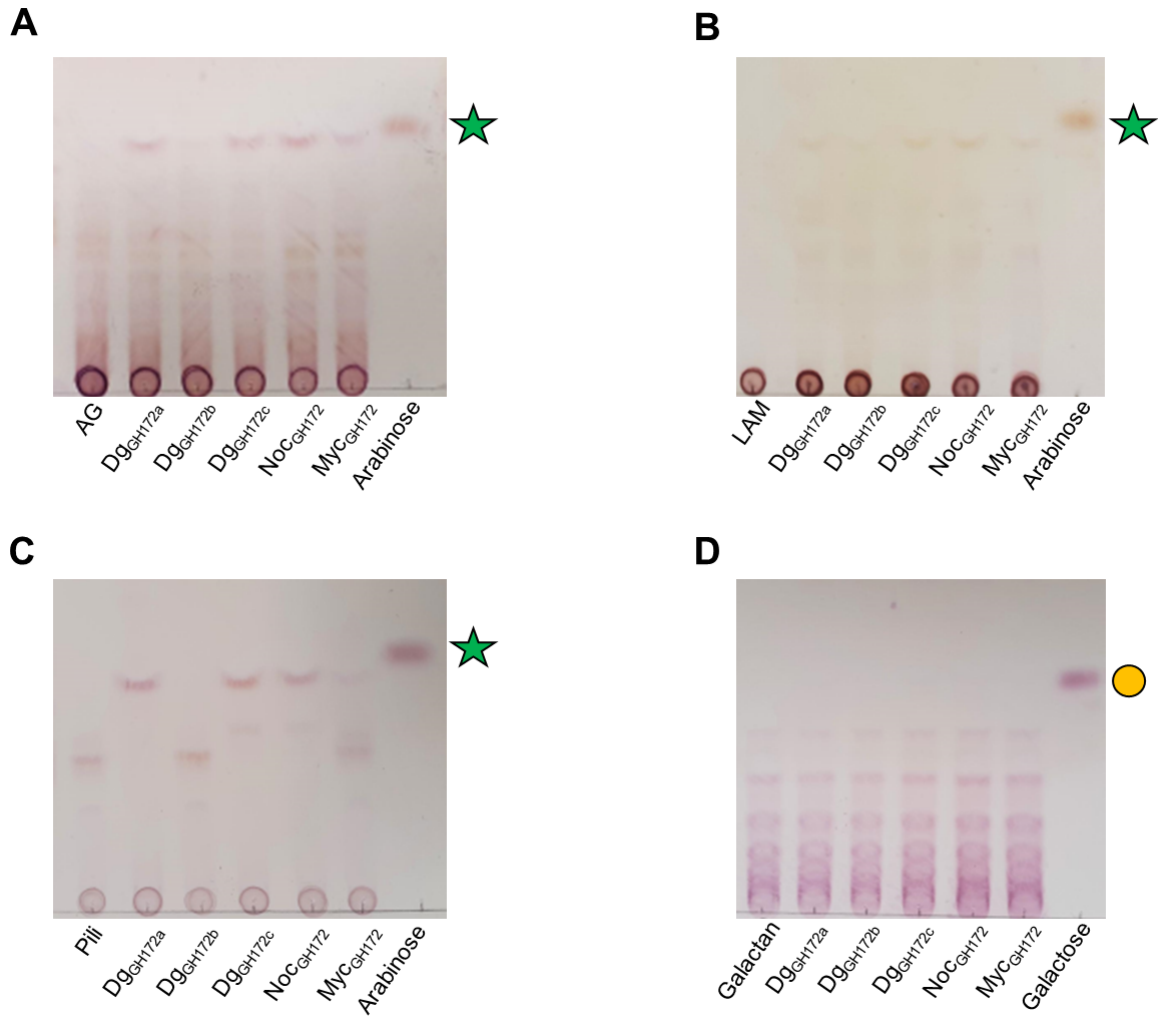

**Figure S3: TLC of GH172 enzyme catalysed reactions.** GH172 enzymes (Dg<sub>GH172a</sub>, Dg<sub>GH172b</sub>, Dg<sub>GH172c</sub>, Noc<sub>GH172</sub>, and Myc<sub>GH172</sub>) were incubated with arabinogalactan (A), LAM (B), pilin oligosaccharides (C), and galactan (D) overnight at 37 °C, analysed by TLC and stained with orcinol. Yellow circles = D-galactose, green stars – D-arabinose.

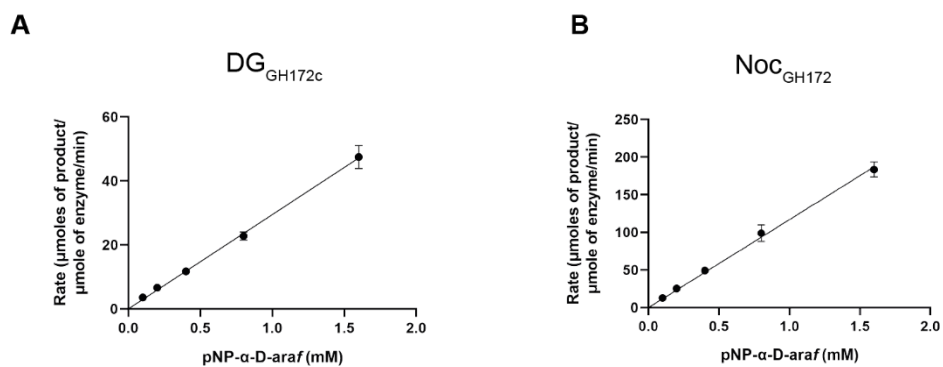

**Figure S4: Michaelis-Menten Kinetics of GH172 enzymes against pNP- $\alpha$ -D-Araf.** Rates were measured with 100 nM enzyme at 37 °C in 20 mM HEPES pH 7.5, against varying concentrations of p-nitrophenyl- $\alpha$ -D-Araf at 400 nm. Each concentration was repeated in triplicate, in some cases the error bars fall within the plotted data-points and are not visible in the plots. n = 3 biological replicates, error bars are +/- standard deviation. Source data are provided in the Source Data file.

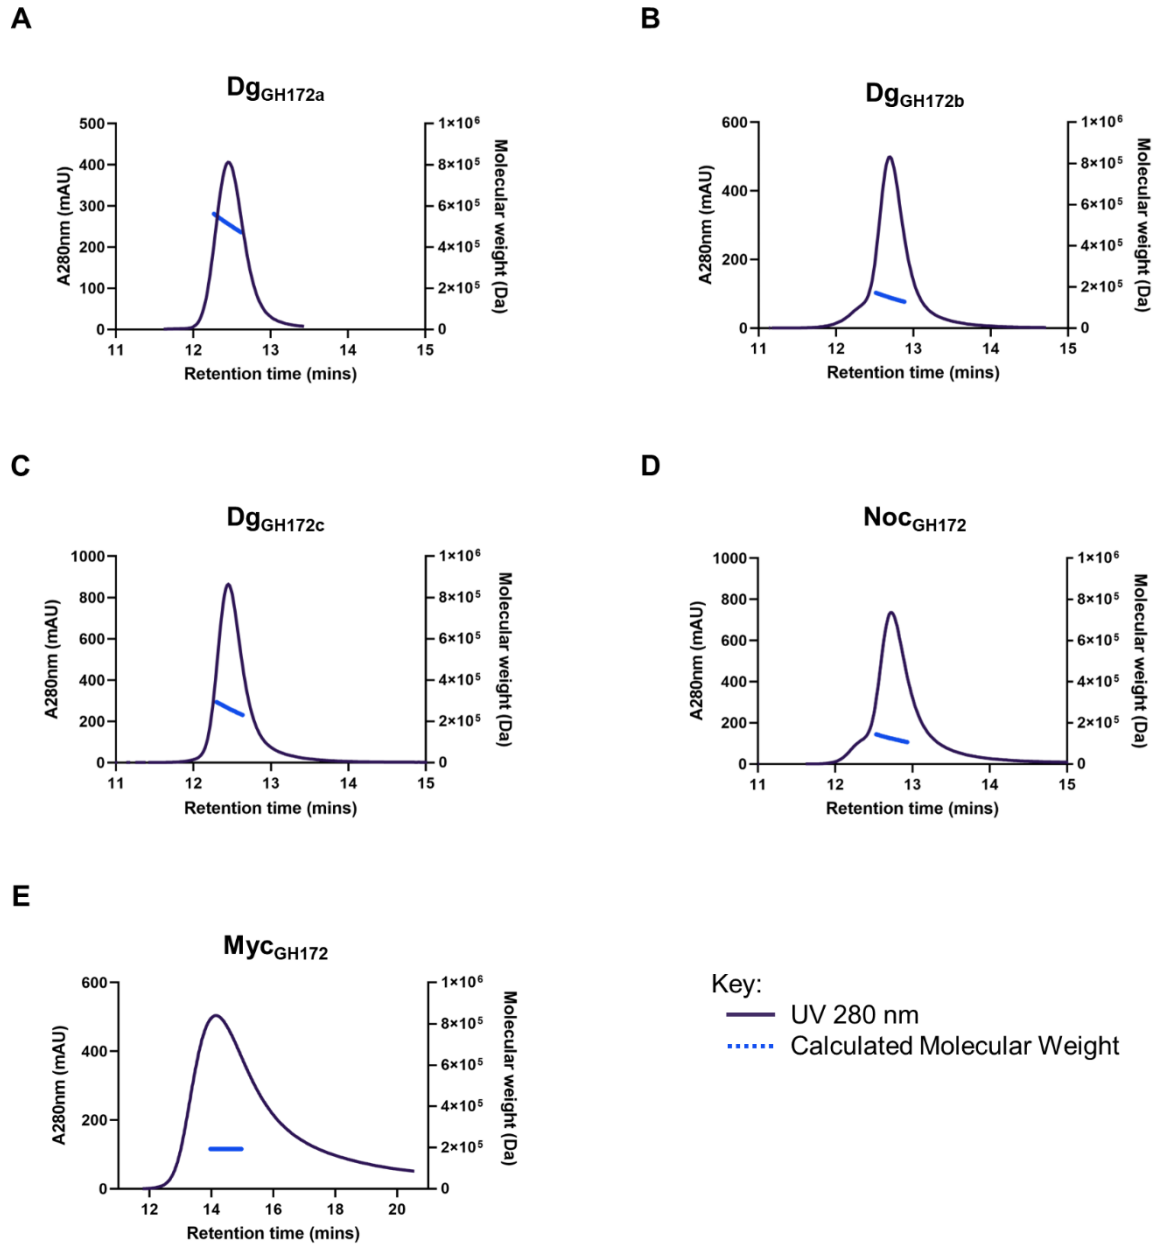

**Figure S5: SEC-MALS of GH172 enzymes.** SEC-MALS analysis of Dg<sub>GH172a</sub> (A), Dg<sub>GH172b</sub> (B), Dg<sub>GH172c</sub> (C), Noc<sub>GH172</sub> (D), and Myc<sub>GH172</sub> (E) allowing assignment of average masses to each GH172 enzyme (Table 3). Masses are consistent with: Dg<sub>GH172a</sub> being a dodecamer; Dg<sub>GH172b</sub> as a dimer species; Dg<sub>GH172c</sub> as a hexamer; and Noc<sub>GH172</sub> and Myc<sub>GH172</sub> as trimeric species. Source data are provided in the Source Data file.

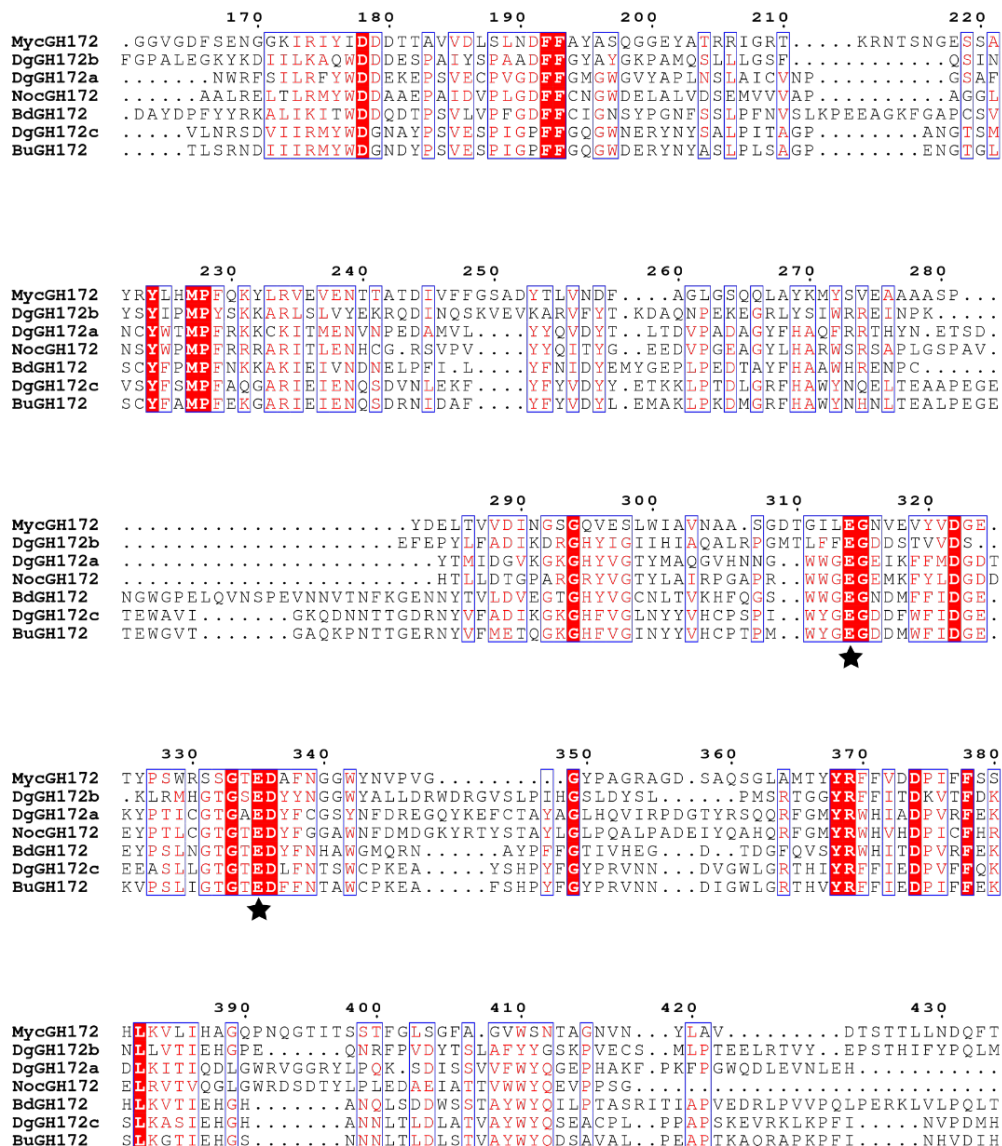

**Figure S6: Sequence alignment of GH172 enzymes.** Protein sequence alignment of GH172 enzymes (DgGH172a, DgGH172b, DgGH172c, BuGH172, BdGH172, NocGH172, and MycGH172). Catalytic residues have been highlighted by a black star. Red boxes with a white character show strict identity, and red character with blue frames show similar residues. Protein sequences were sourced from Uniprot and alignment was performed using Clustal Omega, and then formatted with ESPript 3.

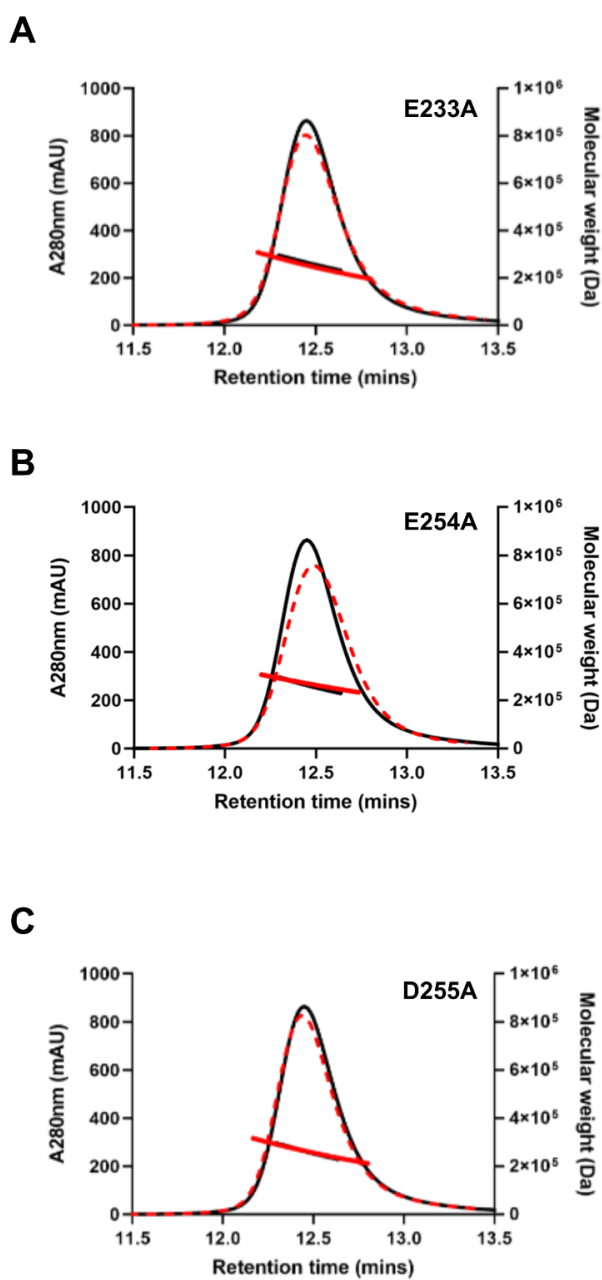

**Figure S7: SEC-LS analysis of  $Dg_{GH172c}$  mutants.** SEC-MALS analysis of  $Dg_{GH172c}$ -E233A (A, dashed red line),  $Dg_{GH172c}$ -E254A (B, dashed red line) and  $Dg_{GH172c}$ -D255A (C, dashed red line) overlaid with  $Dg_{GH172c}$ -WT (black line, A/B/C). All mutants have a weight consistent with that of a hexamer and similar to WT. Source data are provided in the Source Data file.



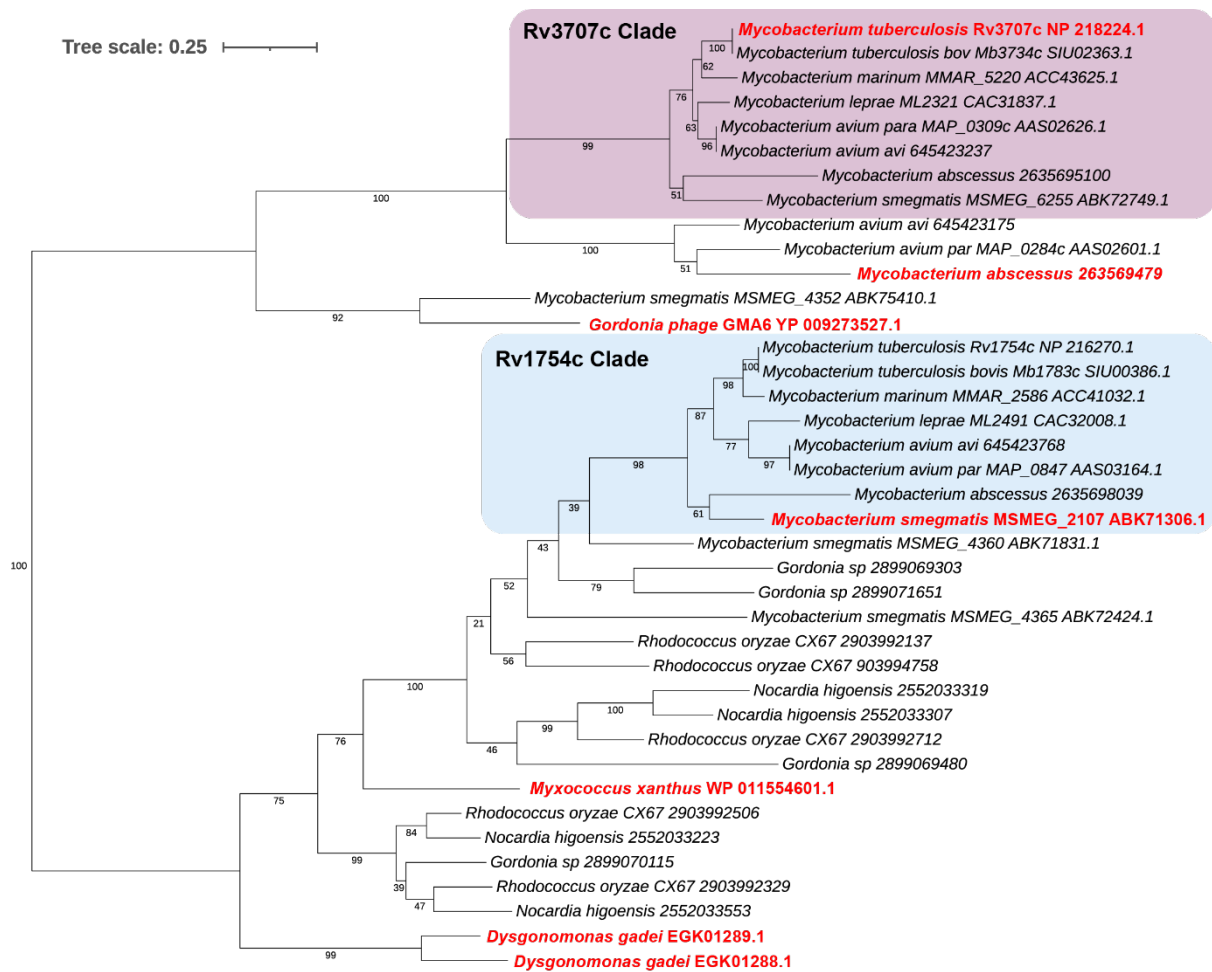

**Figure S8: Phylogeny of DUF4185 enzymes found in selected acid-fast bacteria.** A restricted alignment of 39 complete sequences from a selection of acid-fast bacteria and enzymes characterised in this study were aligned with Clustal Omega using default settings in SEAVIEW v.4.6.4 with some manual adjustments<sup>58,59</sup>. The alignment shows two clear clades of DUF4185 enzymes in acid fast bacteria with some further diversification, mainly in non-mycobacterial species.

### Mycobacteriophage C Cluster:

C1 Spud

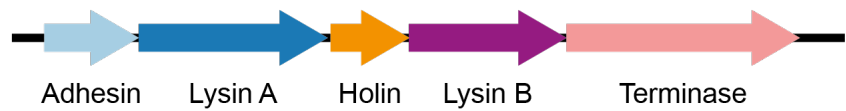

C2 ScoobyDoobyDoo

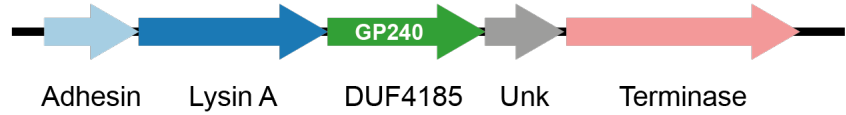

### Gordoniophage DQ Cluster:

DQ GMA6

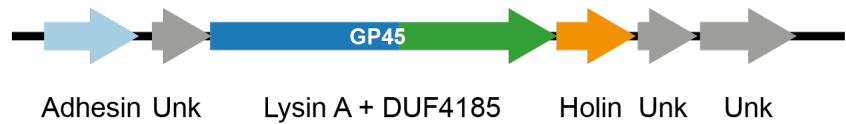

### Rhodococcus phage:

Singleton Finch

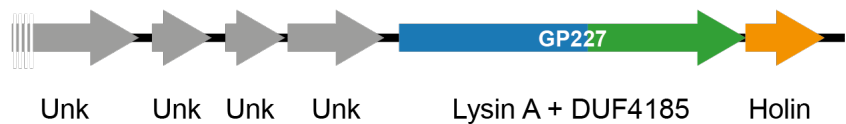

**Figure S9: Organisation of phage lysis cassettes in cluster C, DQ, and a *Rhodococcus* phage singleton.** Genomic regions encoding the lysis cassettes for clusters C1, C2, DQ in addition to the singleton Finch. Lysin B is absent in C, DQ and Finch and appears to be replaced by either a separate DUF4185 enzyme or as a LysinA-DUF4185 fusion. Unk – unknown.

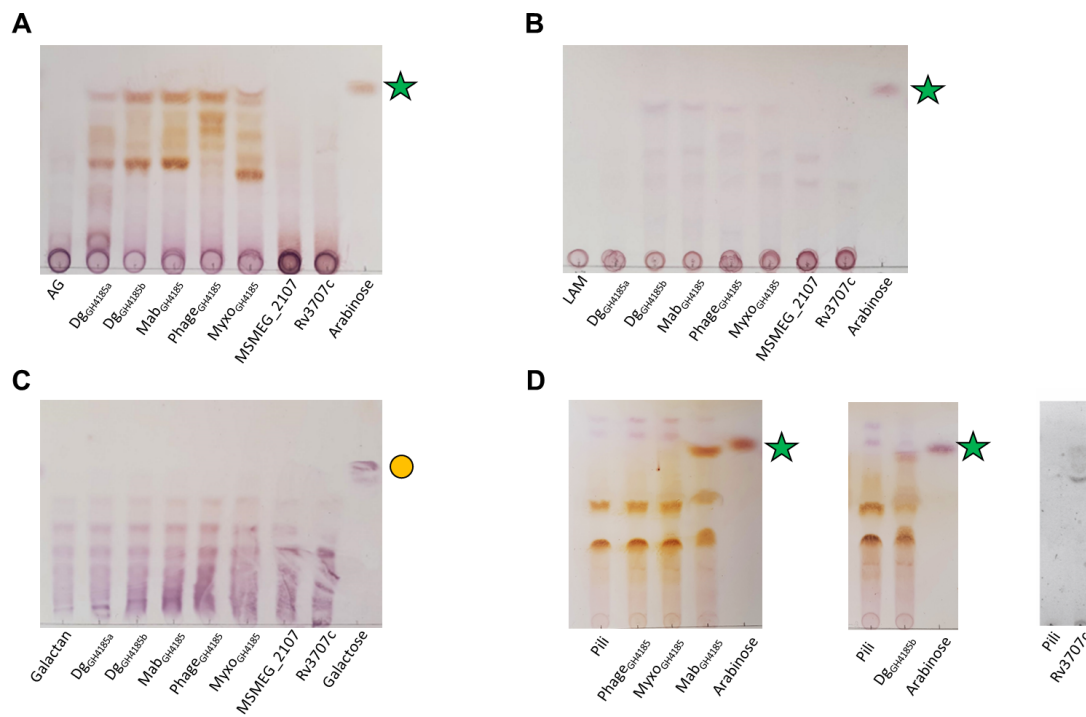

**Figure S10: Thin-layer chromatography (TLC) analysis of DUF4185 enzyme catalysed reactions.** DUF4185 enzymes (Dg<sub>GH4185a</sub>, Dg<sub>GH4185b</sub>, Mab<sub>GH4185</sub>, Phage<sub>GH4185</sub>, Myxo<sub>GH4185</sub>, MSMEG\_2107, and Rv3707c) were incubated with arabinogalactan (A), LAM (B), galactan (C), and pilin oligosaccharides (D) overnight at 37°C. 10  $\mu$ L of each reaction was spotted at the origin of the TLC and the TLC was developed in a system consisting of 2:1:1 (v/v) of 1-butanol:acetic acid:water and visualised by staining with orcinol and charring. Yellow circles = D-galactose, green stars – D-arabinose.

```

170      180      190      200      210      220
MSMEG_2107 TDLGIMWNGN.PGARQVLMAFGDTYGY..C.....GVRGQQWRYNVLFRSQDGAALSNTI AVPNGV
Rv1754c     TDLGIPWNGD.PANRQVLMLRCDTFGY..C.....AVDGHQWRYNTLFRSQDRDLGNVHVTSGD
Myxo4185   TDLGIVWDKGG...GEVFLRCDTFGAGWCNGN...GGCGGGWRNSNVLARSSDTNLANGLSFSSM.
DgGH4185a  TDLGIVWEMNQ...GKYGIFLGDTFGKGFIPDQNDPADFGDNWRCNVLAFAFNDCNLEDGLSIDSM.
DgGH4185b TDLGIIVWEMNP...GKYGIFRGDTFGRDFS PNSAAPGPNGGSWRNSNVLAFSDDNDLEDGLTFNSM.
Rv3707c    TDLCEVVEFP...QLLQVCGDSFAGQVGF...GG...WYAPVALHVDTE.S...IDDP.
MabGH4185  ADLGEVIEIPDGKGGKLVAVFGDSFSTDHVP...PGEAADHYKSWA.VEIKG.FDQNGKPIWGD.
PhageGH4185 TDLGAMIEAPNG...KLVAVFGDTWKRDRVG.....IDWRAPV.IILIGS.KGANGLV IQWER.

```

★ ★

```

230      240      250      260      270      280
MSMEG_2107 PRNFKSGSPVWAPGISKQIINSTKW..AATEKGIIPTA..GVAVGQTQYLNFMSTIRNWSDS DGRWSTN
Rv1754c     ASNRYSGSPVRQPGFSKQLINSIKW..ARDETGIIPTA..GIAVGKTQYVNFMSIRNWGRDGEWTTN
Myxo4185   .....IQDGPRAKEILASRKV..NFDEITVIPTA..GVTIGSRHYIHYMSIHHWGEAGMWF TN
DgGH4185a .....ASDENDNARELIPGGKDKSNGDWTSTIPTA..AIRANNKDYVHYFNMRNWT...GWI TN
DgGH4185b .....AVDVSGNAREIIVGGK DASNGDWTSTIPTA..AIRANNIDYVHYFNMRNWT...GWI TN
Rv3707c    AGVRYTGVTGVGTPLLAD..PTPPG.....DSQLPAGVVQIN.RRNYLMVTTT...KDLQPONS
MabGH4185  VLTGYDGENRPPLEPFTT..GLPPA.AQNT..NTLPAGSIVMRDGTTYMMAAGT...NDLHP...
PhageGH4185 AG.GSDPNYARQLWAYTH..DSPPW.TKGGISTVLPIS..DLIRIGNTLYLHVMTV...NKGFP TVA

```

```

290      300      310      320      330      340      350
MSMEG_2107 YSAITAVSPDNGENWGVYPTVTRTPADGVVSGARYVRGNEVFQQAFLKP...GPGDPYIYTFGTTPS
Rv1754c     YSGITAVSKDNGQTWGVFPPTIRASGPDSSGGKARFVPGNENFQMGAFLKS...N...DGYYSFSGTTP
Myxo4185   HAGITAYSDDQGNWVKHPTARWQNTPA.....WTNNFQMAAFVRN.....GGFYMYATPN
DgGH4185a YSGLYKSEDDGKTWGWKCTTVHFTSD.....SNFGQAGYFKK.....DGYVYMGITET
DgGH4185b YSGMYKSIDNGQTWAKCENVRFSN.....SNFGQGGYFKK.....DGYVYMGITET
Rv3707c    ..RLVRAEAARGGWQTVSGSRRNAAY.....QDGRQTQISGY YDPVPTPDSPTGWVYIVADSF
MabGH4185 .....TGGSWLVKAGDPSQGGWPEPPTWRAGDKAPSQISGY.....QAA DGTVYIADSF
PhageGH4185 WTEIWKSEDSGISWTHLGENSKLS.....GTA.GNGLLQCLSWDY.....NADDGYVYAVSTIGF

```

```

360      370      380      390      400      410
MSMEG_2107 GRGGAAYIARVAPGA..VPDLNRYEYWNNSNTN.SWVPRDPGAAATPVIIPGVGELSAQYNTYLKQYVVL
Rv1754c     GRGGSAYLARVPQRF..VPDLTKYQYWNNGDSN.SWVFNKPDAAATPVIIPGVGEMSVQYNTYLKQYLAL
Myxo4185   GRFGNVHLARVPETA..LLDINGRYRWDGN..GWSVSQ.AAARPVVAIGIAGELSVSYHAPLGRFLMT
DgGH4185a GRHSNPRLARFNEKD..IENQSLYEYWNKDNH.EWIRGDESQATNLFEDTVGELSIAYHNKYKRWIIT
DgGH4185b GRDSNARLARFKEQH..IEDQANYEFWNSLTK.QWLKGDDEEQATNIFNDKVGELSF IYNQKHNKWIIS
Rv3707c    TRGEPAVLYRATPES..FTDRSRWQWAGGPDGGWNKPTPT...LWPDQLGEMSI R..QIDGQTVLS
MabGH4185 DRNQVVTMYRVPVPPGGVLD RDSWQ...PMTNTGWGAPGDPAK.PLTTPPYGVSIR..EVDGRPVLS
PhageGH4185 QRDKGIVLRRFRPTQ..INNOQLWQVWNYNGTWGWR TNVNP SVITPESGEKWGELTIR..KLANGWVVLG

```

```

420      430      440      450      460
MSMEG_2107 YCN.GANDVVMRTAQAPQG.....PWGPE.....QLVLPSTQYPGGIYAPFIHPWS.TGKE
Rv1754c     YTN.GMNDVVAR TAPAPQG.....PWSAE.....QLVSSWQMPGGIYAPMMHPWS.TGKD
Myxo4185   YLNEHRQAVVMRDAATPTG.....PWSGE.....KVLASGAVYP.GLYNAFIHPWGN TGN
DgGH4185a YFCAARYNISIRYAEELTG.....PWSKP.....QLLATGEEYP.QLYGSYIHPVSLDGD
DgGH4185b YFNADRYNITMRTATEITG.....PWSEP.....YELASGVEYA.QLYGSYFHPVSLVDGN
Rv3707c    YFNASTGNMEVVRVAHHTT.SLGAAPVTTVRHDEWPEPAESLPPPYDNRLAQP YGGYISPGSTIDE.
MabGH4185 GLNMGPDPNGTARVEVRVGSAGDPSSVFAWNSPATVLMQQA DPTAPNFVLQNYGGYILPGSTLDN.
PhageGH4185 GLSMHSLGYSRVLSSPTANLYTTPAKRLI WGC EW.....PEEDHTVGKVAQT YGGYIVPGSKLGV

```

```

470      480
MSMEG_2107 ..LYFNLSLWS.....AYNVMLMRTVLP.....
Rv1754c     ..LYFNLSLWS.....AYNVMLMRTVLP.....
Myxo4185   ..LYFVMSOWT.....PYNTFLMRATL LAHD.....
DgGH4185a ..LYFLMSWR.....PYNVFLMR AELLEHHHHHHH.
DgGH4185b ..LYFLMSWML.....PYNVFLMKAE LADMGSFDLEHHHHHH.
Rv3707c    ..LRIFVSDWTRARQNGPYRVIQFAVNF PKPWSDPGSGHHHHHH.
MabGH4185 ..MRVFGSOWVVD..GTPLYNTQLIEVNFHQ.....
PhageGH4185 GGVDIVVSO WNTTV..GWPKVWQFRGTU.....

```

**Figure S11: Sequence alignment of DUF4185 proteins**

Protein sequence alignment of DUF4185 enzymes with putative active site residues highlighted with black stars. Red boxes with a white character show strict identity, and red character with blue frames. Sequence aligned using Clustal Omega and visualised using ESript.

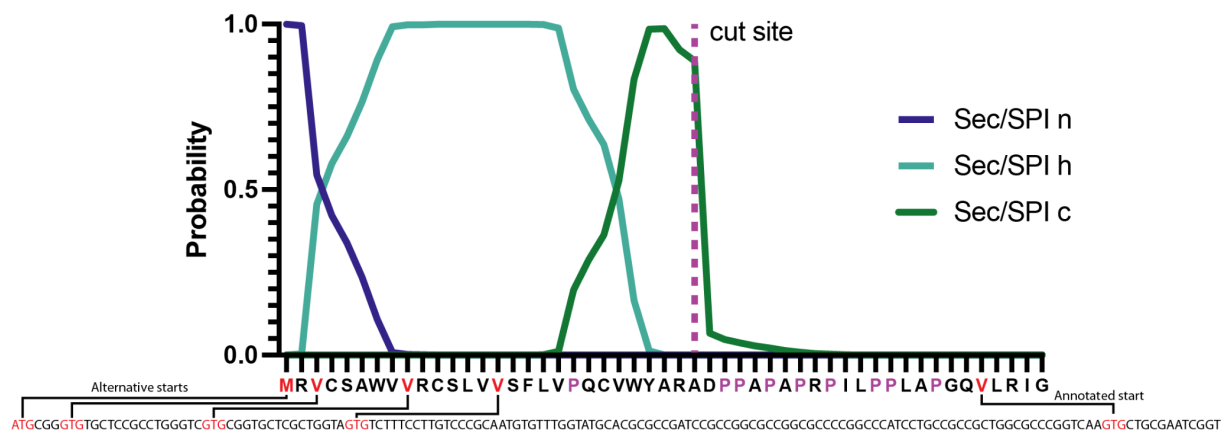

**Figure S12: Start site analysis for Rv3707c.** SignalP 6.0 output for Rv3707c with four potential upstream start sites included. Proline residues are indicated in purple.

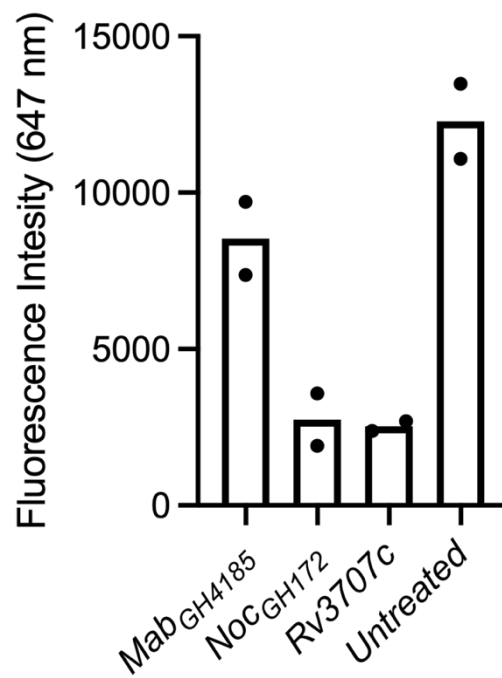

**Figure S13: Release of fluorescently labelled D-arabinan by selected acid-fast enzymes.** Fluorescent mycolyl-arabinogalactan-peptidoglycan complex (mAGP) obtained from 5-AcFPA treated *C. glutamicum* was incubated with 1  $\mu$ M of each enzyme with rotation overnight. After 3 washes, the remaining fluorescent signal was measured. Enzyme activity is represented as a reduction in fluorescence relative to the untreated control (n = 2 technical replicates). Source data are provided in the Source Data file.

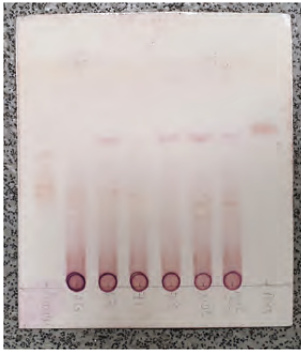

Figure S3A

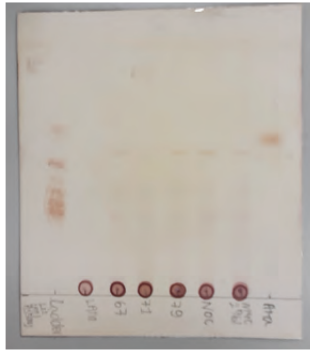

Figure S3B

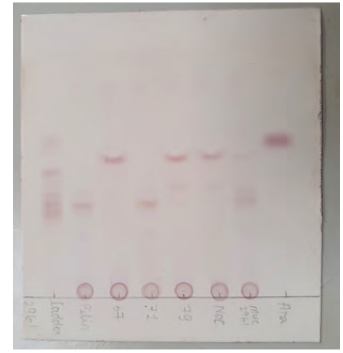

Figure S3C

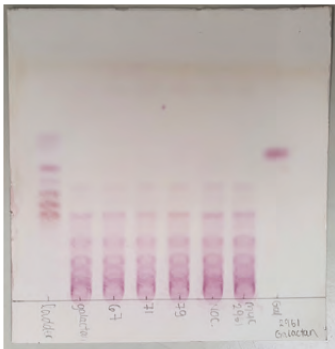

Figure S3D

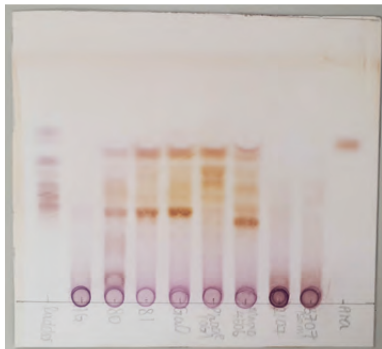

Figure S10A

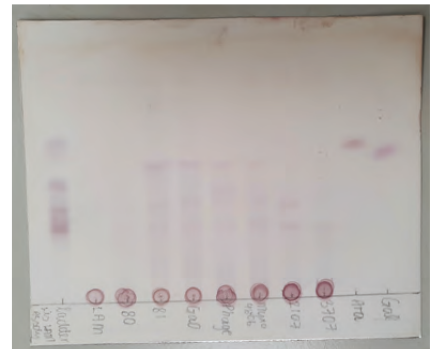

Figure S10B

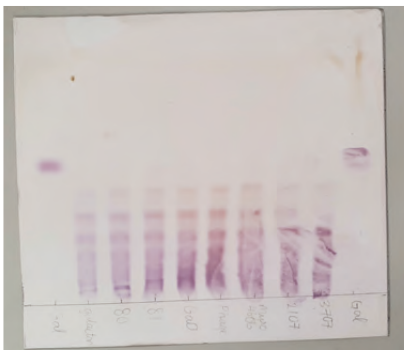

Figure S10C

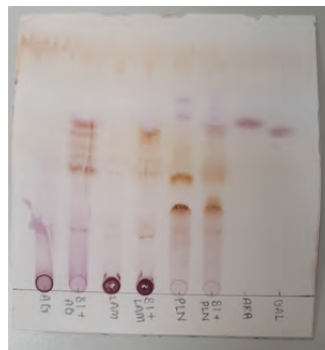

Figure S10D

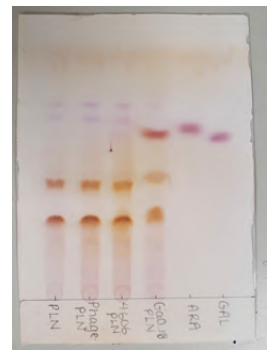

Figure S10D

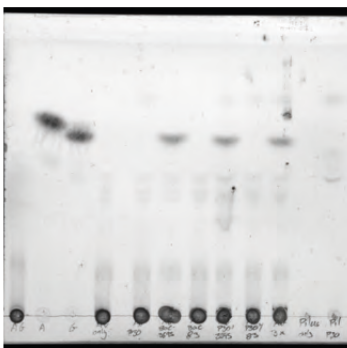

Figure S10D

**Figure S14: Uncropped TLCs for figures in this paper.**

## Supplementary Tables

**Table S1: Recipe for 50ml of 2x defined minimal media**

| Component                                                                                                                                                                                                                                                                                                                                                                                                                                                                           | Mass (mg) or volume (ml) |
|-------------------------------------------------------------------------------------------------------------------------------------------------------------------------------------------------------------------------------------------------------------------------------------------------------------------------------------------------------------------------------------------------------------------------------------------------------------------------------------|--------------------------|
| <b>10x Bacteroides salts (4L)</b><br>(544g KH <sub>2</sub> PO <sub>4</sub> , 35g NaCl, 45g (NH <sub>4</sub> ) <sub>2</sub> SO <sub>4</sub> – pH 7.2)                                                                                                                                                                                                                                                                                                                                | 10 ml                    |
| <b>Balch's vitamins (1L)</b><br>(p-Aminobenzoic acid, 5mg<br>Folic acid, 2mg<br>Biotin, 2mg<br>Nicotinic acid, 5mg<br>Calcium pantothenate, 5mg<br>Riboflavin, 5mg<br>Thiamine HCl, 5mg<br>Pyridoxine HCl, 10mg<br>Cyanocobalamin, 0.1mg<br>Thioctic acid, 5mg<br>Distilled Water, 1L)                                                                                                                                                                                              | 1 ml                     |
| <b>Trace mineral solution (1L)</b><br>EDTA, 0.5g<br>MgSO <sub>4</sub> *7H <sub>2</sub> O, 3g<br>MnSO <sub>4</sub> *H <sub>2</sub> O, 0.5g<br>NaCl, 1g<br>FeSO <sub>4</sub> *7H <sub>2</sub> O, 0.1g<br>CaCl <sub>2</sub> , 0.1g<br>ZnSO <sub>4</sub> *7H <sub>2</sub> O, 0.1g<br>CuSO <sub>4</sub> *5H <sub>2</sub> O, 0.01g<br>H <sub>3</sub> BO <sub>3</sub> , 0.01g<br>Na <sub>2</sub> MoO <sub>4</sub> *2H <sub>2</sub> O, 0.01g<br>NiCl <sub>2</sub> *6H <sub>2</sub> O, 0.02g | 1 ml                     |
| <b>Purine/Pyrimidine solution (1L)</b><br>200 mg each: Adenine (Sigma, A2786)<br>Guanine (Sigma, G11950)<br>Thymine (Sigma, T0895)<br>Cytosine (Sigma, C3506)<br>Uracil (Sigma, U1128)                                                                                                                                                                                                                                                                                              | 1 ml                     |
| <b>Amino acid solution (250 ml)</b><br>62.5 mg of all 20 standard amino acids                                                                                                                                                                                                                                                                                                                                                                                                       | 1 ml                     |
| Vitamin K3 (1 mg/ml)                                                                                                                                                                                                                                                                                                                                                                                                                                                                | 0.1 ml                   |
| FeSO <sub>4</sub> (0.4 mg/ml)                                                                                                                                                                                                                                                                                                                                                                                                                                                       | 0.1 ml                   |
| CaCl <sub>2</sub> (0.8% w/v)                                                                                                                                                                                                                                                                                                                                                                                                                                                        | 0.1 ml                   |
| MgCl <sub>2</sub> (0.1 M)                                                                                                                                                                                                                                                                                                                                                                                                                                                           | 0.1 ml                   |
| Vitamin B12 (0.01 mg/ml)                                                                                                                                                                                                                                                                                                                                                                                                                                                            | 0.05 ml                  |
| L-Cysteine                                                                                                                                                                                                                                                                                                                                                                                                                                                                          | 100 mg                   |
| Distilled water                                                                                                                                                                                                                                                                                                                                                                                                                                                                     | Up to 50 ml total        |

*Solution pH was adjusted to 7.2 and then syringe-filtered through a 0.22 µM membrane filter. It can then be mixed with any 2x carbon source stock (usually 10 mg/ml) in a 1:1 ratio for a 5 mg/ml final carbon source minimal media.*
