# Supplementary material for: Identification of d-arabinan-degrading enzymes in mycobacteria
Source: PubMed Central journal article supplement (PMC10115798; doi:10.1038/s41467-023-37839-5), 2023-04-19
Supplement: 41467_2023_37839_MOESM3_ESM.pdf [file 41467_2023_37839_MOESM3_ESM.pdf]

## Description of Additional Supplementary Files:

**Supplementary Data 1.** Whole cell proteomics of *D. gadei* grown on D-arabinan, ordered by iBAQ. Proteins from PUL42 are coloured blue. The mass spectrometry data have been deposited to the ProteomeXchange Consortium via the PRIDE partner repository with the dataset identifier PXD039984 (<http://www.ebi.ac.uk/pride/archive/projects/PXD039984>).
